# Supplementary material
Source: publisher figshare collection journal article supplement (https://rs.figshare.com/ndownloader/files/14050496)
Supplement: Supplementary file 1 [file 14050496]

## Sheet: Sheet1
Table S8. Selected fossil calibrations used in our study. Information on used fossils are elaborated in Supplementary material S2. Age is given in units of hundreds of millions of years.
Calibration Node	Node Calibrating	Fossil	Voucher #	Phylogenetic justification	Geological Setting	Age	Geo/Age Citation
1	Stem-Corydiidae s.s. / crown-(Nocticola + Corydiidae s.s.)	Cretaholocompsa montsecana	LC-1704-IEI (Fundació Pública Institut d'Estudis llerdencs, Lleida, Spain)	(1) in forewing, occurrence of a single, medial colour spot; (2) in forewing, occurrence of a band parallel to the posterior margin; (3) in forewing, venation lacking prominent tubular, sclerotized structures; (4) in forewing, Radius reaching anterior wing margin basally; (5) in forewing, sharply angulate CuP.	Montsec, Spain	1.2545	see Evangelista et al. 2017
2	Stem-Neoisoptera / crown-(Kalotermitidae + Neoisoptera)	Archeorhinotermes rossi	20160 (Natural History Museum, London, UK)	(1) frontal gland developed into fontanelle; (2) forewing costalized; (3) in forewing, humeral suture present.	Myanmar amber	0.982	see Wolfe et al. 2016
3	Stem-Isoptera / crown-(Cryptocercus + Isoptera)	Valditermes brennae	64588 (Natural History Museum, London, UK)	(1) in forewing, humeral suture present	Clockhouse Brickworks pit	1.308	see Wolfe et al. 2016
4	Stem-Blaberidae / crown-(Blaberidae + (Blattellinae + Nyctiborinae))	"Gyna" obesa	MNHN.F.R06689 (Museum National d’Histoire Naturelle, Paris, France)	(1) asymmetrically concave margin of subgenital plate; (2) cerci stout; (3) in forewing, anterior and posterior margins parallel.	Menat	0.577	Clyde, 2014
5	Stem-Dictyoptera / crown-(Dictyoptera + (Eukinolabia + Xenonomia))	Qilianiblatta namurensis	GMCB 04GNX1001 (Geological Museum of China, Beijing, China)	(1) in forewing, pectinate fusion of RA onto RP; (2) in forewing, CuP bent posteriorly.	Xiaheyan	3.069	see Davydov et al. 2012
6	Stem-Mantophasmatodea / crown-Xenonomia	Juramantophasma sinica	NIGP 142171 (Nanjing Institute of Geology and Palaeontology, Nanjing, China)	(1) enlarged and fan-like pretarsal arolia than can be lifted; (2) head orthognathous; (3) wings absent	Daohugou	1.581	see Wolfe et al. 2016
7	Stem-Embioptera / crown-Eukinolabia	Alexarasnia rossica	PIN 3840/63 (Palaeontological Institute, Moscow, Russia)	(1) in both wing pairs, RA margined along edges by membranous, hyaline lines; (2) occurrence of a blood sinus along RA; (3) in both wing pairs, between ScP and AA1, occurrence of intervenal hyaline & concave lines	Isady	2.541	Multiple studies, see Supplement Material S2
8	stem-Ensifera / crown-Orthoptera	Raphogla rubra	Ld LAP 415 (Musée Fleury, Lodève, France)	(1) in forewing, branching pattern of CuA + CuPaα: CuPaα2 posteriorly directed, then CuA anteriorly directed, then CuPaα1 variable; (2) in forewing, branches of ScP with convex intercalary veins between them.	Lodève	2.718	see Wolfe et al. 2016
9	Stem-Dermaptera / crown-(Zoraptera + Dermaptera)	Protelytron permianum	YPM IP 001019 (Yale Peabody Museum, New Haven, USA	(1) in hind wing, vein broadenings forming an arc (i.e. a ring fold); (2) forewing sclerotized.	Elmo	2.718	see Wolfe et al. 2016
